# Supplementary material for: Probiotics in Oral Health and Disease: A Systematic Review
Source: MDPI journal article supplement (doi:10.3390/app11178070), 2021-08-31
Supplement: s1 [file s1]

## Probiotics in oral health and disease: a systematic review

Perrine Saiz, Nuno Taveira and Ricardo Alves, Centro de Investigação Interdisciplinar Egas Moniz (CiEM), Instituto Universitário Egas Moniz, 2829-511 Monte de Caparica, Portugal. Corresponding author: Nuno Taveira ([ntaveira@egasmoniz.edu.pt](mailto:ntaveira@egasmoniz.edu.pt))

**Table S10** - Characteristics of clinical trials of probiotics in oral wound healing and treatment of oral mucositis related to cancer treatment

| Reference<br>Oral condition                                                                  | Parameters evaluated -<br>Evaluation time                                                                                                                            | Study design -<br>Groups of study                                                                                                                                                                                                                                   | Sample size<br>(at the end of the study)-<br>Age or age group                                                                                                                                                                                                                                                                                      | Vehicle -<br>Administration time                                                                                   | Probiotic strain(s) used<br>(Dose)                                                                                                                                                                                    |
|----------------------------------------------------------------------------------------------|----------------------------------------------------------------------------------------------------------------------------------------------------------------------|---------------------------------------------------------------------------------------------------------------------------------------------------------------------------------------------------------------------------------------------------------------------|----------------------------------------------------------------------------------------------------------------------------------------------------------------------------------------------------------------------------------------------------------------------------------------------------------------------------------------------------|--------------------------------------------------------------------------------------------------------------------|-----------------------------------------------------------------------------------------------------------------------------------------------------------------------------------------------------------------------|
| <b>Twetman <i>et al.</i>, 2018</b><br>Biopsy oral wound                                      | Clinical: healing, pain, VAS scores, need other medication/Immunological (through wound exudate, saliva) - 2, 5 and 8 days                                           | RCT, placebo-controlled, double-blind (pilot study)<br>Run-in (1 week)/ biopsy (standardized wound)/ intervention (8 days)/ washout 4 weeks/ run-in (1 week)/ biopsy (standardized wound)/ intervention (8 days) - Probiotic group and Placebo group                | 10 healthy adults with normal mucosa - 21-66 years                                                                                                                                                                                                                                                                                                 | Lozenge + oil topic drop 2mL - 1 week (twice a day + once a day) before the wound and 8 days after                 | <i>Lactobacillus reuteri</i> DSM 17938 and ATCC PTA 5289 (5 x 10 <sup>8</sup> live bacteria in each lozenge and 2 x 10 <sup>8</sup> CFU/mL in each drop)                                                              |
| <b>Twetman <i>et al.</i>, 2018</b><br>Biopsy oral wound and MMPs, IFNs                       | Immunological: levels of MMPs, IFNs in wound exudate - 2, 5 and 8 days                                                                                               | RCT, placebo-controlled, double-blind (pilot study)<br>Run-in (1 week)/ biopsy (standardized wound)/ intervention (8 days)/ washout 4 weeks/ run-in (1 week)/ biopsy (standardized wound)/ intervention (8 days) - Probiotic group and Placebo group                | 10 healthy adults with normal mucosa - 21-66 years                                                                                                                                                                                                                                                                                                 | Lozenge: 1 week (twice a day) before the wound and 8 days after<br>Oil topic drop: 8 days after wound (once a day) | <i>Lactobacillus reuteri</i> DSM 17938 and ATCC PTA 5289 (5 x 10 <sup>8</sup> live bacteria in each lozenge and 2 x 10 <sup>8</sup> CFU/mL in each drop)                                                              |
| <b>Wälivaara <i>et al.</i>, 2019</b><br>Surgical removal of third mandibular molars          | <i>Staphylococcus aureus</i> and <i>S.β-hemolytic</i> in wound exudate, pain, swelling, oxytocin salivary - 1, 2 weeks                                               | RCT, placebo controlled, double-blind, parallel - Probiotic group and Placebo group                                                                                                                                                                                 | 61 patients - 18-34 years                                                                                                                                                                                                                                                                                                                          | Lozenges – 2 weeks (3 times a day)                                                                                 | <i>Lactobacillus reuteri</i> DSM 17938 and ATCC PTA 5289 (2 x 10 <sup>8</sup> CFU/ml in each drop)                                                                                                                    |
| <b>Jiang <i>et al.</i>, 2018</b><br>Oral mucositis induced by chemo-radiotherapy             | Oral mucositis - baseline, 7 weeks                                                                                                                                   | RCT placebo-controlled, double-blind - Probiotic group and Placebo (starch) group                                                                                                                                                                                   | 93 patients with nasopharyngeal carcinoma treated by chemoradiotherapy (70 Gy in 32 fractions: 2,19 Gy/day, 5days/week; with the gross tumor volume and the clinical target volume receiving 60 Gy in 32 fractions for 45 days (total, 6-7 weeks) + cisplatin intravenous 100mg/m <sup>2</sup> day 1, 22, 43 - 18-70 years                         | Capsule – 7 weeks (three times a day)                                                                              | <i>Bifidobacterium longum</i> , <i>Lactobacillus lactis</i> and others <i>Enterococcus faecium</i>                                                                                                                    |
| <b>Limaye <i>et al.</i>, 2013</b><br>Oral mucositis induced by chemotherapy                  | Oral mucositis, vital signs, bacterial and hTFF1 levels in saliva and mucosa, delivery vehicle - cycle 1: every day cycle 2: baseline, day 2, 7 and 14, up to 1 year | RCT placebo-controlled, single blind<br>Cycle 1: QT appearance of oral mucositis (25 subjects)<br>Cycle 2: intervention (22 subjects at the end) - Test group: AG013 once a day/Test group: AG013 times a day/Test group: AG013 6times a day/Control group: placebo | 22 patients with newly diagnosed squamous cell LAHNC (QT: cisplatin, 5-FU, with or without docetaxel (PTF or PF) with oral mucositis - mean age 54 years                                                                                                                                                                                           | Mouthwash 15mL – 14 days (1 or 3 or 6 times a day)                                                                 | <i>Lactococcus lactis</i> (AG013) [2 x 10 <sup>11</sup> CFU / 15mL ( <i>i.e.</i> 2 x 10 <sup>11</sup> or 6 x 10 <sup>11</sup> or 1.2 x 10 <sup>12</sup> CFU / day for each frequency of administration respectively)] |
| <b>Sharma <i>et al.</i>, 2012</b><br>Oral mucositis induced by chemotherapy and radiotherapy | Parameters evaluated: mucositis grade, quality of life, body weight, nutrition - N/A                                                                                 | RCT double-blind - Probiotic group and Placebo group (sugars and salts)                                                                                                                                                                                             | 188 patients with radical RT at the dose of 70 Gy (35 fractions) for 7 weeks (5 fractions / week) per linear accelerator / parallel / parallel fields and medullary shield at 44 Gy; QT concomitant with cisplatin (DDP) 40 mg / m <sup>2</sup> weekly (7 doses: days 1, 8, 15, 22, 29, 36, 43) from day 1 of the RT treatment - mean age 51 years | Lozenge - During QT/RT and up to 1 week after (6 lozenges per day)                                                 | <i>Lactobacillus brevis</i> CD2 (2 x 10 <sup>9</sup> CFU)                                                                                                                                                             |
