# Supplementary material for: Probiotics in Oral Health and Disease: A Systematic Review
Source: MDPI journal article supplement (doi:10.3390/app11178070), 2021-08-31
Supplement: s1 [file s1]

**Probiotics in oral health and disease: a systematic review**

Perrine Saiz, Nuno Taveira and Ricardo Alves, Centro de Investigação Interdisciplinar Egas Moniz (CiiEM), Instituto Universitário Egas Moniz, 2829-511 Monte de Caparica, Portugal. Corresponding author: Nuno Taveira ([ntaveira@egasmoniz.edu.pt](mailto:ntaveira@egasmoniz.edu.pt))

**Table S5** - Characteristics of clinical trials of probiotics in periodontal diseases

| Reference<br>Oral condition                                                                 | Parameters evaluated -<br>Evaluation time                                                                                                                                                                                                                     | Study design -<br>Groups of study                                                                                                                                                                                                                         | Sample size<br>(at the end of the study)-<br>Age or age group                                                                      | Vehicle -<br>Administration time                                                                              | Probiotic strain(s) used<br>(Dose)                                                                                                                                                                                                                                                                                                 |
|---------------------------------------------------------------------------------------------|---------------------------------------------------------------------------------------------------------------------------------------------------------------------------------------------------------------------------------------------------------------|-----------------------------------------------------------------------------------------------------------------------------------------------------------------------------------------------------------------------------------------------------------|------------------------------------------------------------------------------------------------------------------------------------|---------------------------------------------------------------------------------------------------------------|------------------------------------------------------------------------------------------------------------------------------------------------------------------------------------------------------------------------------------------------------------------------------------------------------------------------------------|
| <b>Butera <i>et al.</i>, 2021</b><br>Periodontitis                                          | Clinical: PD, CAL, BOP, GI, PI, AG, RG /<br>Microbiological (subgingival samples) -<br>baseline, 3 and 6 months                                                                                                                                               | RCT parallel, controlled, single-blind<br>Group 1 (control): SRP + Chlorhexidine-based<br>toothpaste<br>Group 2: SRP + probiotics-based toothpaste<br>Group 3: SRP + probiotics-based toothpaste and<br>chewing-gum                                       | 60 patients with periodontitis<br>stage II-III -<br>18-70 years                                                                    | Chewing-gum (20 min per day,<br>the last 10 days of each month)<br>and toothpaste – 6 months<br>(twice a day) | <i>Bifidobacterium</i> and <i>Lactobacillus</i> in toothpaste ;<br><i>L. reuteri</i> (SGL 01), <i>L. salivarius</i> (SGL 03), <i>L. plantarum</i> (SGL 07) in chewing-gum                                                                                                                                                          |
| <b>Laleman <i>et al.</i>, 2020</b><br>Chronic periodontitis                                 | Clinical: PD, CAL, BOP, PI, RG<br>/Microbiological (saliva, dental plaque,<br>tongue, subgingival samples) -<br>baseline, 12, 24 weeks                                                                                                                        | RCT placebo-controlled, double-blind<br>1 <sup>st</sup> step: SRP + 5 Probiotic drop -<br>Probiotic group and Placebo group                                                                                                                               | 39 patients treated for chronic<br>periodontitis, with residuals<br>pockets -<br>media 58+/-12-13 years                            | Drop (5) and lozenges -<br>12 weeks (twice a day)                                                             | <i>Lactobacillus reuteri</i> ATCC PTA 5289 and DSM<br>17938<br>(2 x 10 <sup>8</sup> CFU)                                                                                                                                                                                                                                           |
| <b>Ikram <i>et al.</i>, 2019</b><br>Chronic periodontitis                                   | Clinical: PI, BOP, CAL, PD -<br>baseline, 6 and 12 weeks                                                                                                                                                                                                      | RCT -<br>Group A: SRP + ATB (amoxicillin 500mg +<br>metronidazole 400mg 3 times a day for 7 days) /<br>Group B: SRP + Probiotic                                                                                                                           | 30 healthy patients with<br>generalized chronic<br>periodontitis –<br>mean age> 30 years                                           | Brushing with powder mixed<br>with water -<br>3 months (twice a day)                                          | <i>Lactobacillus reuteri</i><br>(1.2 x 10 <sup>9</sup> CFU)                                                                                                                                                                                                                                                                        |
| <b>Yuki <i>et al.</i>, 2019</b><br>Periodontitis                                            | Clinical: PD, GI, PMA -<br>baseline, 45, 90, 120 days                                                                                                                                                                                                         | RCT placebo controlled, double-blind -<br>Probiotic group: <i>L. rhamnosus L8020</i> (+ <i>S. thermophilus</i> ); pH 4.35 and<br>Placebo group: <i>L. bulgaricus</i> (+ <i>S. thermophilus</i> ) (1.5<br>× 10 <sup>9</sup> acid lactic bacteria); pH 4.37 | 23 patients with intellectual<br>disability -<br>20-45 years                                                                       | Yogurt 80g (once a day) -<br>90 days                                                                          | <i>Lactobacillus rhamnosus L8020</i> (+ <i>Streptococcus thermophilus</i> )<br>(1.5 × 10 <sup>9</sup> acid lactic bacteria + 2.0 × 10 <sup>7</sup> CFU<br>L8020/gr)                                                                                                                                                                |
| <b>Boyeena <i>et al.</i>, 2019</b><br>Chronic periodontitis                                 | Clinical: PI, BOP, PD -<br>baseline, day 45                                                                                                                                                                                                                   | RCT parallel -<br>Group A: SRP + probiotics/Group B: SRP +<br>tetracycline fibers (10mg mixed with 0.2mL of<br>saline)/Group C: SRP + tetracycline fibers (10mg) +<br>probiotics (0.04mg)                                                                 | 30 patients with chronic<br>periodontitis -<br>20-50 years                                                                         | Subgingival –<br>1time application                                                                            | <i>Lactobacillus acidophilus</i> , <i>Lactobacillus rhamnosus</i><br>0.6 x 10 <sup>9</sup> CFU each, <i>Bifidobacterium bifidus</i> ,<br><i>Bifidobacterium longum</i> 0.60 x 10 <sup>6</sup> CFU mixed with<br>tragacanth gum (TG) powder<br>(0.04 mg of probiotic powder* mixed with 0.02 mg<br>of TG powder + 0.2 ml of saline) |
| <b>Grusovin <i>et al.</i>, 2019</b><br>Periodontitis<br>stages III and IV, grade C<br>(TPS) | Clinical: PD, BOP, CAL -<br>baseline, 3, 6, 9 and 12 months                                                                                                                                                                                                   | RCT placebo-controlled, double-blind<br>3 months of probiotics/ 3 months of wash-<br>out/3months of probiotics/3 months of wash-out (12<br>months) -<br>Probiotic group and Placebo group + SRP                                                           | 20 patients with periodontitis<br>stages III-IV, grade C, treated -<br>31-70 years                                                 | Lozenges –<br>3 months (twice a day)                                                                          | <i>Lactibacillus. reuteri</i> DSM 17938 and PTA 5389                                                                                                                                                                                                                                                                               |
| <b>Murugesan <i>et al.</i>, 2018</b><br>Aggressive periodontitis                            | Clinical: OHI-S, GI, BOP, PD, CAL -<br>baseline, 4, 8, 12 weeks                                                                                                                                                                                               | RCT placebo-controlled, double-blind -<br>Test group: SRP + ATB + symbiotic /<br>Control group: SRP + ATB + placebo<br><br>Note: ATB = doxycycline 100mg 2x / day on the 1st<br>day followed by 100mg 1x / day for 1 week                                 | 60 patients with aggressive<br>periodontitis -<br>18-30 years                                                                      | Lozenges -<br>8 weeks (twice a day)                                                                           | <i>Clostridium butiricum</i> TO-A (2 x 10 <sup>6</sup> ), <i>Bacillus mesentericus</i> TO-A JPC (1 x 10 <sup>6</sup> ), <i>Lactobacillus sporogenes</i> (50 x 10 <sup>6</sup> ),<br>prebiotic <i>Streptococcus faecalis</i> T-110 JPC (30x10 <sup>6</sup><br>CFU)                                                                  |
| <b>Invernici <i>et al.</i>, 2018</b><br>Chronic periodontitis                               | Clinical: PI, BOP, PD, CAL, RG/<br>Immunological: IL-1, IL-10, IL-8 levels<br>in GCF/Microbiological (subgingival<br>plaque samples in moderate 4-6mm and<br>deep pockets >7mm: evaluation of 40<br>subgingival bacterial species) -<br>baseline, 30, 90 days | RCT placebo-controlled -<br>Test group: SRP + probiotic / Control group: SRP +<br>placebo                                                                                                                                                                 | 41 healthy patients with<br>generalized chronic<br>periodontitis -<br>> 30 years                                                   | Lozenges -<br>30 days (twice a day)                                                                           | <i>Bifidobacterium animalis subsp. lactis</i> HN019<br>(10 <sup>9</sup> CFU)                                                                                                                                                                                                                                                       |
| <b>Sajedinejad <i>et al.</i>, 2018</b><br>Chronic periodontitis                             | Clinical: PI, GI, BOP, PD -<br>baseline, 14, 28 days                                                                                                                                                                                                          | RCT placebo-controlled, double-blind -<br>Test group: SRP + probiotic / Control group: SRP +<br>placebo                                                                                                                                                   | 40 healthy patients with<br>moderate to severe chronic<br>periodontitis (PD ≥4 mm, CAL<br>≥3 mm, bone loss ≥3 mm) -<br>24-52 years | Mouthwash 20mL -<br>28 days (twice a day)                                                                     | <i>Lactobacillus salivarius</i> NK02<br>(10 <sup>8</sup> CFU)                                                                                                                                                                                                                                                                      |

|                                                                          |                                                                                                                                                                                                                                                       |                                                                                                                                      |                                                                                                                                                                                                     |                                                                             |                                                                                                     |
|--------------------------------------------------------------------------|-------------------------------------------------------------------------------------------------------------------------------------------------------------------------------------------------------------------------------------------------------|--------------------------------------------------------------------------------------------------------------------------------------|-----------------------------------------------------------------------------------------------------------------------------------------------------------------------------------------------------|-----------------------------------------------------------------------------|-----------------------------------------------------------------------------------------------------|
| <b>Morales <i>et al.</i>, 2018</b><br>Chronic periodontitis              | Clinical: CAL, BOP, PI/<br>Microbiological (subgingival plaque samples on 4 periodontal sites (1 in each quadrant) with CAL> 1mm, PD> 4mm and BOP) - baseline, 3, 6 and 9 months                                                                      | RCT controlled, double-blind -<br>Antibiotic group (azithromycin 500mg once a day for 5 days) / Placebo group / Probiotic group      | 47 healthy patients with chronic periodontitis - > 35 years                                                                                                                                         | Tablet - 3 months (once a day)                                              | <i>Lactobacillus rhamnosus</i> SP1 (2 x 10 <sup>7</sup> CFU)                                        |
| <b>Chandra <i>et al.</i>, 2016</b><br>Chronic periodontitis              | Clinical: PD, CAL, PI, GI / Viability of probiotic in pocket (days 0, 2, 4, 7, 14) - baseline, 1 week, 3 and 6 months                                                                                                                                 | RCT placebo-controlled -<br>Test group: SRP + probiotic (1 <sup>st</sup> site) / Control group: SRP + placebo (2 <sup>nd</sup> site) | 30 patients with chronic periodontitis at least 2 PD pockets> 5mm and at least 1 pocket in each quadrant - 25-50 years                                                                              | Power 1g blend - N/A                                                        | <i>Saccharomyces boulardii</i> (5 x 10 <sup>9</sup> CFU) with fructooligosaccharide prebiotic       |
| <b>Penala <i>et al.</i>, 2016</b><br>Chronic periodontitis and halitosis | Clinical: halitosis (ORG), PI, GI, BOP, PD, CAL, CAG/ Microbiological (subgingival samples)/Biochemical: BANA – baseline, 1 and 3 months (PD, CAL only at baseline and 3 months)                                                                      | RCT placebo-controlled, double-blind -<br>Test group: SRP + probiotic / Control group: SRP + placebo                                 | 29 healthy patients with chronic periodontitis at least 4 teeth with PD ≥ 5 mm, CAL ≥ 4 mm, and clinically perceptible halitosis - 25-59 years                                                      | Subgingival (after SRP, weeks 1, 2, 4) and mouthwash (14 days, twice a day) | <i>Lactobacillus salivarius</i> , <i>Lactobacillus reuteri</i> (2 x 10 <sup>9</sup> CFU each)       |
| <b>Iwasaki <i>et al.</i>, 2016</b><br>Chronic periodontitis (SPT)        | Clinical: PI, GI, BOP, PD - baseline, 4, 8, 12 weeks                                                                                                                                                                                                  | RCT placebo-controlled, double-blind -<br>Probiotic group and Placebo group                                                          | 36 patients in the SPT phase after chronic periodontitis with one or more initial periodontal pockets≥ 4mm and have completed treatment - mean age 66.2 years                                       | Capsule - 12 weeks (once a day)                                             | <i>Lactobacillus plantarum</i> L-137                                                                |
| <b>Imran <i>et al.</i>, 2015</b><br>Chronic periodontitis                | Clinical: PI, GI/Microbiological: <i>P. gingivalis</i> , <i>P. intermedia</i> , <i>A. actinomycetacomitans</i> (subgingival samples) - baseline, 1 and 2 months                                                                                       | RCT -<br>Probiotic group and Placebo group                                                                                           | 42 healthy patients with chronic periodontitis generalized (slight-moderate) - 20-50 years                                                                                                          | Milk - 1 month (once a day)                                                 | <i>Lactobacillus casei</i> (6.5 x 10 <sup>9</sup> -10 <sup>8</sup> CFU/mL)                          |
| <b>Ince <i>et al.</i>, 2015</b><br>Chronic periodontitis                 | Clinical: PI, GI, BOP, PD, CAG/ Immunological: levels of MMP-8, TIMP-1 in GCF (in 2 teeth with 8 sites) - baseline, days 21, 90, 180, 360                                                                                                             | RCT parallel, placebo-controlled, double-blind -<br>Test group: SRP + probiotic / Control group: SRP + placebo                       | 30 patients with chronic periodontitis, horizontal bone loss detected radiographically and with at least 2 teeth with proximal site, each with PD 5-7mm and GI> 2 in each quadrant - 35-50 years    | Lozenges - 3 weeks (twice a day)                                            | <i>Lactobacillus reuteri</i>                                                                        |
| <b>Laleman <i>et al.</i>, 2015</b><br>Periodontitis                      | Clinical: PD, BOP, CAL, GI, PI, REC/ Microbiological (supragingival plaque, subgingival, saliva and tongue samples) – baseline 12, 24 weeks                                                                                                           | RCT placebo-controlled, double-blind -<br>Test group: SRP + probiotic / Control group: SRP                                           | 48 healthy patients with moderate to severe periodontitis - 37-58 years                                                                                                                             | Tablet - 12 weeks (twice a day)                                             | <i>Streptococcus oralis</i> KJ3, <i>Streptococcus uberis</i> KJ2, <i>Streptococcus rattus</i> JH145 |
| <b>Tekce <i>et al.</i>, 2015</b><br>Chronic periodontitis                | Clinical: PI, GI, BOP, PD, CAL/ Microbiological (at least 2 teeth with a proximal site with a PD of 5-7 mm and an GI of ≥2 in each quadrant, total counts of viable cells and proportions of anaerobic bacteria) – baseline, days 2, 21, 90, 180, 360 | RCT controlled, double-blind -<br>Test group: SRP + probiotic / Control group: SRP + placebo                                         | 40 patients with chronic periodontitis with at least two teeth with a proximal site, each with PD 5-7 mm and GI≥2 in each quadrant and horizontal bone loss detected radiographically - 35-50 years | Lozenges - 3 weeks (twice a day)                                            | <i>Lactobacillus reuteri</i>                                                                        |
| <b>Szkaradkiewicz <i>et al.</i>, 2014</b><br>Chronic periodontitis       | Clinical: PI, GI, CAL, PD/ Immunological: levels of TNF-α, IL-1β, IL-17 in GCF – N/A                                                                                                                                                                  | RCT -<br>Probiotic group and Control group                                                                                           | 38 healthy patients with moderate chronic periodontitis - 31-46 years                                                                                                                               | Tablet - (twice a day)                                                      | <i>Lactobacillus reuteri</i> ATCU PTA 5289 (10 <sup>8</sup> CFU)                                    |

|                                                              |                                                                                                                                                     |                                                                                                                                                  |                                                                                                     |                                     |                                                                                                   |
|--------------------------------------------------------------|-----------------------------------------------------------------------------------------------------------------------------------------------------|--------------------------------------------------------------------------------------------------------------------------------------------------|-----------------------------------------------------------------------------------------------------|-------------------------------------|---------------------------------------------------------------------------------------------------|
| <b>Vicario <i>et al.</i>, 2013</b><br>Chronic periodontitis  | Clinical: PI, GI, PD 4-5mm,<br>PD> 6mm –<br>baseline, 30 days                                                                                       | RCT placebo-controlled, double-blind -<br>Probiotic group and Placebo group                                                                      | 19 healthy patients with chronic<br>periodontitis slight<br>to moderate -<br>mean age 55 years      | Tablet –<br>30 days (once a day)    | <i>Lactobacillus reuteri</i> ATCC 55730 and ATCCPTA<br>5289<br>(2 x 10 <sup>8</sup> viable cells) |
| <b>Teughels <i>et al.</i>, 2013</b><br>Chronic periodontitis | Clinical: PD, REC, BOP, GI, PI, CAL/<br>Microbiological (saliva, subgingival and<br>supragingival plaques samples) –<br>baseline, weeks 3, 6, 9, 12 | RCT placebo-controlled, double-blind -<br>Test group: SRP + probiotic /Control group: SRP +<br>placebo                                           | 30 healthy patients with<br>generalized moderate to severe<br>chronic periodontitis -<br>> 35 years | Lozenges -<br>12 weeks (once a day) | <i>Lactobacillus reuteri</i> DSM17938 and ATCC<br>PTA5289<br>(9 x 10 <sup>8</sup> CFU each)       |
| <b>Shah <i>et al.</i>, 2013</b><br>Aggressive periodontitis  | Clinical: PI, GI, PD, CAL/<br>Microbiological (saliva samples) -<br>baseline, 2 weeks, 2months                                                      | RCT -<br>Group A: probiotic /Group B: probiotic + doxycycline<br>100mg (1x/ day for 14 days) /Group C: doxycycline<br>100mg 1x / day for 14 days | 30 patients with aggressive<br>periodontitis -<br>14-35 years                                       | Lozenges -<br>14 days (twice a day) | <i>Lactobacillus brevis</i> CD2<br>(10 <sup>8</sup> CFU)                                          |
