# Supplementary material for: Probiotics in Oral Health and Disease: A Systematic Review
Source: MDPI journal article supplement (doi:10.3390/app11178070), 2021-08-31
Supplement: s1 [file s1]

# **Probiotics in oral health and disease: a systematic review**

Perrine Saiz, Nuno Taveira and Ricardo Alves, Centro de Investigação Interdisciplinar Egas Moniz (CiiEM), Instituto Universitário Egas Moniz, 2829-511 Monte de Caparica, Portugal. Corresponding author: Nuno Taveira ([ntaveira@egasmoniz.edu.pt](mailto:ntaveira@egasmoniz.edu.pt))

**Table S7** - Characteristics of clinical trials of probiotics in cariology

| Reference<br>Oral condition                                                                                                                 | Parameters evaluated -<br>Evaluation time                                                                                                                        | Study design -<br>Groups of study                                                                                                                                                      | Sample size (at the end of the<br>study)-<br>Age or age group                                          | Vehicle -<br>Administration time                                            | Probiotic strain(s) used<br>(Dose)                                                                                                                                |
|---------------------------------------------------------------------------------------------------------------------------------------------|------------------------------------------------------------------------------------------------------------------------------------------------------------------|----------------------------------------------------------------------------------------------------------------------------------------------------------------------------------------|--------------------------------------------------------------------------------------------------------|-----------------------------------------------------------------------------|-------------------------------------------------------------------------------------------------------------------------------------------------------------------|
| <b>Pahumunto <i>et al.</i>, 2018</b><br>Dental carie                                                                                        | Clinical: caries/ Microbiological: SM, LB (saliva samples) - baseline, 3, 4, 6 months                                                                            | RCT placebo-controlled, double-blind, parallel groups -<br>Test group: milk with probiotic / Control group: standard milk                                                              | 103 children -<br>1.5-5 years                                                                          | Milk 5g with 50mL water -<br>3 months (once a day)                          | <i>Lactobacillus paracasei</i> SD1<br>(10 <sup>7</sup> CFU/g)                                                                                                     |
| <b>Rodriguez <i>et al.</i>, 2016</b><br>Dental carie                                                                                        | Clinical: ICDAS -<br>baseline and 10 months                                                                                                                      | RCT placebo-controlled, triple blind -<br>Test group: milk with probiotic / Control group: standard milk                                                                               | 243 children -<br>2-3 years                                                                            | 150mL milk -<br>10 months (once a day) -                                    | <i>Lactobacillus rhamnosus</i> SP1 (10 <sup>7</sup> CFU/mL)                                                                                                       |
| <b>Di Pierro <i>et al.</i>, 2015</b><br>Dental carie                                                                                        | Cariogramme -<br>baseline, day 90                                                                                                                                | RCT, placebo controlled -<br>Probiotic group and Placebo group                                                                                                                         | 76 children with high dental decay risk -<br>6-17 years                                                | Tablet -<br>90 days (once a day)                                            | <i>Streptococcus salivarius</i> M18<br>(1 x 10 <sup>9</sup> CFU)                                                                                                  |
| <b>Teanpaisan <i>et al.</i>, 2015</b><br>Dental carie                                                                                       | Clinical: caries/Microbiological: SM, LB (unstimulated saliva samples)/ Biochemical (pH) -<br>baseline, 3, 6, 9, 12 months                                       | RCT placebo-controlled, double-blind -<br>Test group: milk with probiotic / Control group: standard milk                                                                               | 122 children -<br>12-14 years                                                                          | Milk 5g with 50 mL water-<br>6 months (once a day)                          | <i>Lactobacillus paracasei</i> SD1 (10 <sup>7</sup> CFU/mg)                                                                                                       |
| <b>Hedayati-Hajikand <i>et al.</i>, 2015</b><br>Dental carie                                                                                | Clinical: caries, PI, gingival health                                                                                                                            | RCT placebo-controlled, double-blind -<br>Probiotic group and Placebo group                                                                                                            | 110 children -<br>2-3 years                                                                            | Tablet -<br>3 months (once a day)                                           | <i>Streptococcus uberis</i> KJ2TM, <i>Streptococcus oralis</i> KJ3TM, <i>Streptococcus rattus</i> JH145TM<br>(10 <sup>8</sup> CFU)                                |
| <b>Stensson <i>et al.</i>, 2014</b><br>Dental carie                                                                                         | Clinical: caries, PI, GI/ Microbiological SM, LB (plaque and saliva samples)/ Immunological: levels of sIgA -<br>baseline and at 9 years old                     | RCT placebo-controlled, simple blind -<br>Test group: oil containing live probiotic derived from breast milk / Placebo group                                                           | 113 babies (and their mothers) -<br>9 years                                                            | Drops -<br>4 weeks before birth to 1 year of age (5 drops per day)          | <i>Lactobacillus reuteri</i><br>(10 <sup>8</sup> CFU)                                                                                                             |
| <b>Taipale <i>et al.</i>, 2013</b><br>Dental carie                                                                                          | Clinical: ICDAS, PI/Microbiological: SM (plaque samples) -<br>1, 8, 24 months and 4 years old                                                                    | RCT -<br>Probiotic group + xylitol 100-300mg/Xylitol group (100-300mg)/Sorbitol group (100-300mg)                                                                                      | 106 children -<br>1-2 months                                                                           | Slow release or tablet -<br>From 1-2 months of age to 2 years (twice a day) | <i>Bifidobacterium animalis subsp. lactis</i> BB-12<br>(5 x 10 <sup>9</sup> CFU)                                                                                  |
| <b>Hasslöf <i>et al.</i>, 2013</b><br>Dental carie                                                                                          | Clinical: caries/Microbiological SM, LB (saliva samples), probiotic colonization -<br>3, 6 and 9 years old                                                       | RCT placebo-controlled, double-blind -<br>Probiotic group and Placebo group                                                                                                            | 118 babies -<br>4 months                                                                               | Supplementary cereals -<br>9 months (once a day)                            | <i>Lactobacillus paracasei</i> F19<br>(10 <sup>8</sup> CFU)                                                                                                       |
| <b>Ferrer <i>et al.</i>, 2019</b><br>Salivary pH, colonization of probiotic <i>S.dentisani</i> , level of <i>S.mutans</i> , acid production | Microbiological: SM, colonization of <i>S.dentisani</i> /Biochemical: pH salivary, acid production (dental plaque and saliva samples) -<br>baseline, 14, 28 days | Study pilot phase 1, prospective, parallels groups<br>Scalling 1 <sup>st</sup> and confection of dental gutter -<br>Groups: unique dose or multi-dose (1 by the dentist and 6 at home) | 11 healthy patients -<br>25-35 years                                                                   | Topical adhesive gel 5min -<br>1 week (once a day) or unique dose           | <i>Streptococcus dentisani</i> CECT7746<br>(+ guar gum + hydroxyethyl cellulose)<br>(monodose 4 x 10 <sup>10</sup> CFUs<br>multi-dose 5.5 x 10 <sup>9</sup> CFUs) |
| <b>Manmontri <i>et al.</i>, 2019</b><br>Levels of <i>S. mutans</i>                                                                          | Clinical: caries / Microbiological: SM (salivary, dental plaque samples), LB, total bacteria/ -<br>baseline, 6, 12 months                                        | RCT placebo-controlled, double-blind -<br>Group I: placebo group/Group II: once a day/Group III: 3 days/week probiotics (fortnightly) and 4 days/week placebo                          | 268 children -<br>1-5 years                                                                            | Milk 50mL -<br>6 months (once a day)                                        | <i>Lactobacillus paracasei</i> SD1<br>(1.8 x 10 <sup>7</sup> CFU/mL in 20% skimmed milk)                                                                          |
| <b>Villavicencio <i>et al.</i>, 2018</b><br>Salivary cariogenic microflora, salivary pH                                                     | Clinical: ICDAS, PI/ Microbiological: SM, LB/ Biochemical: pH, buffer capacity -<br>baseline, 9 months                                                           | RCT placebo-controlled, triple blind -<br>Probiotic group (probiotic milk) / Control group (standard milk)                                                                             | 321 children -<br>3-4 years                                                                            | Milk 200mL -<br>9 months (once a day for 5 days per week)                   | <i>Lactobacillus rhamnosus</i> (5 x 10 <sup>6</sup> CFU/g) and<br><i>Bifidobacterium longum</i> (3 x 10 <sup>6</sup> CFU/g)                                       |
| <b>Alamoudi <i>et al.</i>, 2018</b><br>Salivary cariogenic microflora, salivary pH                                                          | Clinical: PI/Microbiological: LB, SM/ Biochemical: salivary pH, buffer capacity -<br>baseline, 28 days                                                           | RCT controlled, double-blind -<br>Probiotic group and Control group                                                                                                                    | 178 children -<br>3-6 years                                                                            | Lozenges -<br>28 days (twice a day)                                         | <i>Lactobacillus reuteri</i> DSM 17938 and ATCC PTA 5289                                                                                                          |
| <b>Bafna <i>et al.</i>, 2018</b><br>Salivary cariogenic microflora                                                                          | Microbiological: LB, SM (saliva samples) -<br>baseline, 2 and 4 weeks                                                                                            | RCT controlled, double-blind -<br>Probiotic group and Control group                                                                                                                    | 70 adults with high risk of caries and with salivary SM count > 10 <sup>6</sup> CFU/mL -<br>> 18 years | Yogurt 100g -<br>2 weeks (once a day)                                       | <i>Lactobacillus acidophilus</i> LA5 and<br><i>Bifidobacterium lactis</i> BB12                                                                                    |
| <b>Nagarajappa <i>et al.</i>, 2015</b><br>Salivary cariogenic microflora                                                                    | Microbiological: LB, SM (saliva samples) -<br>baseline, 1h, 18 days                                                                                              | RCT controlled, double-blind -<br>Probiotic group and Control group                                                                                                                    | 30 adults -<br>18-22 years                                                                             | Ice cream 42g to 60mL -<br>18 days (once a day)                             | <i>Bifidobacterium infantis</i> 35624<br>(10 <sup>6</sup> CFU/mL)                                                                                                 |

|                                                                                                      |                                                                                                                    |                                                                                                                                                                                                                                                                    |                                                                                                                                                                   |                                                              |                                                                                                              |
|------------------------------------------------------------------------------------------------------|--------------------------------------------------------------------------------------------------------------------|--------------------------------------------------------------------------------------------------------------------------------------------------------------------------------------------------------------------------------------------------------------------|-------------------------------------------------------------------------------------------------------------------------------------------------------------------|--------------------------------------------------------------|--------------------------------------------------------------------------------------------------------------|
| <b>Ashwin <i>et al.</i>, 2015</b><br>Salivary cariogenic microflora                                  | Microbiological: SM (saliva samples)-<br>baseline, 7, 30 days, 6months                                             | RCT placebo-controlled, double-blind -<br>Probiotic group and Placebo group                                                                                                                                                                                        | 60 children with 0 DMFT -<br>6-12 years                                                                                                                           | Ice cream 54g -<br>7 days (once a day)                       | <i>Lactobacillus acidophilus</i> LA5 and<br><i>Bifidobacterium lactis</i> BB12<br>(10 <sup>6</sup> CFU each) |
| <b>Nozari <i>et al.</i>, 2015</b><br>Salivary cariogenic microflora                                  | Microbiological: LB, SM (saliva<br>samples) –<br>N/A                                                               | RCT placebo-controlled, double-blind, parallel<br>4 periods: 1 <sup>st</sup> and 3 <sup>rd</sup> : washout 1-2week respectively; 2 <sup>nd</sup><br>and 4 <sup>th</sup> : intervention 2weeks -<br>Test group: probiotic yogurt / Control group: placebo<br>yogurt | 49 children -<br>6-12 years                                                                                                                                       | Yogurt 200g -<br>2 weeks (once a day)                        | <i>Bifidobacterium lactis</i><br>(10 <sup>6</sup> CFU/g)                                                     |
| <b>Javid <i>et al.</i>, 2015</b><br>Salivary cariogenic microflora                                   | Microbiological: LB, SM (saliva<br>samples) -<br>baseline, 2 weeks                                                 | RCT, single blind -<br>Probiotic group and Control group (yogurt 300g/d)                                                                                                                                                                                           | 66 adults with early caries -<br>18-30 years                                                                                                                      | Yogurt 300g -<br>2 weeks (twice a day)                       | <i>Bifidobacterium lactis</i><br>(10 <sup>6</sup> CFU/mL)                                                    |
| <b>Bhalla <i>et al.</i>, 2015</b><br>Levels of <i>S. mutans</i>                                      | Microbiological: SM (saliva samples)<br>-<br>baseline, 1h, 7 days                                                  | RCT controlled -<br>Probiotic group and Control group (curd)                                                                                                                                                                                                       | 30 caries free children -<br>12-14 years                                                                                                                          | Curd 200g -<br>7 days (once a day)                           | <i>Bifidobacterium animalis subsp. lactis</i> BB-12                                                          |
| <b>Teanpaisan &amp; Piwat 2014</b><br>Levels of <i>S. mutans</i>                                     | Microbiological: LB, SM, salivary<br>yeasts and probiotic colonization<br>(PCR) -<br>baseline, 1, 2, 3, 4, 8 weeks | RCT prospective, controlled-placebo, double-blind -<br>Group A: probiotic and group B: placebo (standard<br>powdered milk)                                                                                                                                         | 37 adults with caries in less than 2<br>teeth, absence of active untreated<br>cariou lesions and absence of<br>gingivitis or periodontal disease -<br>18-25 years | Milk powder 10g with 50mL<br>water -<br>4 weeks (once a day) | <i>Lactobacillus paracasei</i> SD1                                                                           |
| <b>Campus <i>et al.</i>, 2014</b><br>Cariogenic microflora,<br>salivary pH, gingival<br>health       | Clinical: BOP/Microbiological: SM/<br>Biochemical: salivary pH -<br>baseline, 3, 6, 8 weeks                        | RCT controlled-placebo, double-blind -<br>Probiotic group and Placebo group                                                                                                                                                                                        | 181 children with 2 to 3 carious<br>lesions and salivary concentration<br>of SM $\geq 10^5$ CFU / mL -<br>6-8 years                                               | Lozenges -<br>6 weeks (twice a day)                          | <i>Lactobacillus brevis</i> CD2                                                                              |
| <b>Mortazavi &amp; Akhlaghi 2012</b><br>Salivary cariogenic microflora                               | Microbiological: LB, SM (saliva<br>samples) -<br>baseline, 2 weeks                                                 | RCT -<br>Probiotic group and Placebo group                                                                                                                                                                                                                         | 60 healthy adults with active<br>untreated carious lesions and signs<br>of gingivitis or periodontal disease -<br>18-37 years                                     | White cheese 50g -<br>2 weeks (twice a day)                  | <i>Lactobacillus casei</i> LAFTI L26<br>(10 <sup>6</sup> CFU/g)                                              |
| <b>Cildir <i>et al.</i>, 2012</b><br>Salivary cariogenic microflora in children<br>with cleft palate | Microbiological: LB, SM (saliva<br>samples: CRT test) -<br>baseline, 25 days                                       | RCT, cross-over, double-blind<br>4 periods: 2 <sup>nd</sup> and 4 <sup>th</sup> of 25 days each (intervention)/1 <sup>st</sup> and<br>3 <sup>rd</sup> of 1 and 3 weeks respectively (washout) -<br>Probiotic group and Placebo group                               | 19 children operated on with cleft<br>lip and palate without lesions of<br>untreated caries -<br>4-12 years                                                       | Drop -<br>25 days (5 drops per day)                          | <i>Lactobacillus reuteri</i> DSM 17938 and ATCC<br>PTA 5289<br>(1.3 x 10 <sup>8</sup> CFU/5drops)            |
| <b>Sudhir <i>et al.</i>, 2012</b><br>Levels of <i>S. mutans</i><br>and salivary pH                   | Microbiological: SM (saliva samples)/<br>Biochemical: salivary pH -<br>baseline, 30 days                           | RCT -<br>Probiotic group (curd with probiotic) / Placebo group<br>(200mL curd)                                                                                                                                                                                     | 40 caries free children -<br>10-12 years                                                                                                                          | 200mL curd -<br>30 days (once a day)                         | <i>Lactobacillus acidophilus</i>                                                                             |
