# Supplementary material for: Probiotics in Oral Health and Disease: A Systematic Review
Source: MDPI journal article supplement (doi:10.3390/app11178070), 2021-08-31
Supplement: s1 [file s1]

# Probiotics in oral health and disease: a systematic review

Perrine Saiz, Nuno Taveira and Ricardo Alves, Centro de Investigação Interdisciplinar Egas Moniz (CiiEM), Instituto Universitário Egas Moniz, 2829-511 Monte de Caparica, Portugal. Corresponding author: Nuno Taveira ([ntaveira@egasmoniz.edu.pt](mailto:ntaveira@egasmoniz.edu.pt))

**Table S3** - Characteristics of clinical trials of probiotics in the oral ecosystem

| Reference<br>Oral condition                                                        | Parameters evaluated -<br>Evaluation time                                                                                                                    | Study design -<br>Groups of study                                                                                                                                                                                                                                          | Sample size<br>(at the end of the study)-<br>Age or age group                                                                                                                                                         | Vehicle -<br>Administration time                                                                                                                          | Probiotic strain(s) used<br>(Dose)                                                                                                                                               |
|------------------------------------------------------------------------------------|--------------------------------------------------------------------------------------------------------------------------------------------------------------|----------------------------------------------------------------------------------------------------------------------------------------------------------------------------------------------------------------------------------------------------------------------------|-----------------------------------------------------------------------------------------------------------------------------------------------------------------------------------------------------------------------|-----------------------------------------------------------------------------------------------------------------------------------------------------------|----------------------------------------------------------------------------------------------------------------------------------------------------------------------------------|
| Sarmiento <i>et al.</i> ,<br>2019<br>Oral microbiota                               | Microbiological (saliva samples) and<br>probiotic colonization -<br>baseline, 7, 11, 14, 21, 26, and 28<br>days                                              | RCT controlled -<br>Probiotic group and Placebo group (Petit-Suisse)                                                                                                                                                                                                       | 39 children -<br>10-12 years                                                                                                                                                                                          | Petit-suisse 50g -<br>2 weeks (once a day, Monday<br>to Friday in the 1 <sup>st</sup> week and<br>Monday through Thursday in<br>the 2 <sup>nd</sup> week) | <i>Lactobacillus casei</i>                                                                                                                                                       |
| Rungsri <i>et al.</i> ,<br>2017<br>Oral microbiota                                 | Microbiological: SM, LB salivary/<br>Clinical: DMFT, PI, GI/Biochemical:<br>salivary pH -<br>baseline, 4 (microbiological<br>parameters only) and 8 weeks    | RCT prospective, controlled, double-blind -<br>Test group ( <i>L.rhamnosus</i> SD11) and Control group<br>( <i>L.bulgaricus</i> )                                                                                                                                          | 43 adults with dental carie cavited<br>in $\leq 2$ teeth, absence of<br>periodontal disease -<br>20-25 years                                                                                                          | Milk 100mL -<br>4 weeks (once a day)                                                                                                                      | <i>Lactobacillus rhamnosus</i> SD11 or<br><i>Lactobacillus bulgaricus</i> (control)                                                                                              |
| Romani Vestman<br><i>et al.</i> , 2015<br>Oral microbiota                          | Microbiological (saliva and biofilm<br>samples for microbiota composition,<br>pyrosequencing, culture, PCR) -<br>baseline, 4, 8, 12 weeks, 1 and 6<br>months | RCT, placebo-controlled, double-blind -<br>Test group (probiotic, isomalt, hydrogenated palm oil,<br>mint and pepper flavoring, peppermint oil and<br>sucralose) / Control group                                                                                           | 44 adults free of caries or<br>periodontal disease -<br>20-66 years                                                                                                                                                   | Lozenges -<br>12 weeks (twice a day)                                                                                                                      | <i>Lactobacillus reuteri</i> DSM 17938 and<br>ATCC PTA 5289<br>(10 <sup>8</sup> CFU each)                                                                                        |
| Toiviainen <i>et al.</i> ,<br>2015<br>Oral microbiota                              | Clinical: PI, GI/ Microbiological: SM,<br>LB -<br>baseline, 4 weeks                                                                                          | RCT controlled, double-blind -<br>Probiotic group and Placebo group                                                                                                                                                                                                        | 62 adults with salivary SM scores<br>$\geq 10^3$ CFU/mL -<br>mean age 24 years                                                                                                                                        | Lozenges -<br>4 weeks (4 times a day)                                                                                                                     | <i>Lactobacillus rhamnosus</i> and<br><i>Bifidobacterium animalis subsp. lactis</i><br>BB-12<br>(2 x 10 <sup>9</sup> cells each)                                                 |
| Burton <i>et al.</i> , 2013<br>Oral microbiota                                     | Clinical: PI, GI/Microbiological -<br>1, 2, 3, 7 months                                                                                                      | RCT controlled, double-blind -<br>Probiotic group and Placebo group                                                                                                                                                                                                        | 83 children with caries experience<br>(at least 3 restorations, 1 placed in<br>the last 12 months), without<br>detection of BLIS-producing <i>S.</i><br><i>salivarius</i> ; 10 <sup>4</sup> CFU/ml SM -<br>5-10 years | Lozenges -<br>3 months (twice a day)                                                                                                                      | <i>Streptococcus salivarius</i> M18                                                                                                                                              |
| Thakkar, 2013<br>Dental biofilm                                                    | Clinical: PI -<br>baseline, 15 days, 3 weeks later                                                                                                           | RCT controlled -<br>Placebo group (colored distilled water)/ CHX group<br>0.12%/ Probiotic group                                                                                                                                                                           | 90 children without active caries,<br>mild to moderate plaque score -<br>13-15 years                                                                                                                                  | Mouthwash (1g with 10mL<br>water) -<br>14 days (once a day)                                                                                               | <i>Lactobacillus acidophilus</i> ,<br><i>Lactobacillus rhamnosus</i> ,<br><i>Bifidobacterium longum</i> ,<br><i>Saccharomyces boulardii</i><br>(1.25 x 10 <sup>9</sup> CFU each) |
| Keller & Twetman<br>2012<br>Oral microbiota<br>and acid lactic<br>synthesis        | Microbiological: SM, LB/<br>Biochemical: lactic acid -<br>baseline, 2 weeks                                                                                  | RCT cross-over, double-blind<br>4 phases: cleaning/ intervention (2 weeks) / washout (3<br>weeks) / intervention (2 weeks) -<br>Probiotic group and Placebo group                                                                                                          | 18 adults with salivary moderate,<br>high SM count;<br>without visible open caries lesion<br>or periodontal disease -<br>mean age 26 years                                                                            | Tablet -<br>2 weeks (3 times a day)                                                                                                                       | <i>Lactobacillus reuteri</i> DSM 17938 and<br>ATCC PTA 5289<br>(10 <sup>8</sup> CFU each)                                                                                        |
| Martinen <i>et al.</i> ,<br>2012<br>Dental biofilm and<br>acid lactic<br>synthesis | Microbiological: SM, LB and<br>colonization by probiotics/<br>Biochemical: lactic acid<br>(supragingival plaque sample) -<br>baseline, 2 weeks               | RCT cross-over, double-blind<br>4 phases: washout (3 weeks)/<br>1 <sup>st</sup> probiotic (2 weeks)/ washout (5weeks)/ 2 <sup>nd</sup><br>probiotic (2 weeks) -<br>Probiotic group 1: <i>L. rhamnosus</i> GG / Probiotic group<br>2: <i>L. reuteri</i> SD2112 and PTA 5289 | 13 adults with SM > 10 <sup>4</sup> CFU/mL,<br>low DMFT scores -<br>mean age 25.3 years                                                                                                                               | Tablet -<br>2 weeks (twice a day)                                                                                                                         | <i>Lactobacillus rhamnosus</i> GG or<br><i>Lactobacillus reuteri</i> SD2112 and<br>PTA 5289                                                                                      |

|                                                |                                                                            |                                                                                                                                                                      |                                                                             |                                  |                                                          |
|------------------------------------------------|----------------------------------------------------------------------------|----------------------------------------------------------------------------------------------------------------------------------------------------------------------|-----------------------------------------------------------------------------|----------------------------------|----------------------------------------------------------|
| Keller <i>et al.</i> , 2012<br>Microbiota oral | Microbiological: SM (stimulated saliva samples) - baseline, 1, 6, 12 weeks | RCT, multicentric, double-blind, parallel<br>Day 0: prophylaxis + 1% CHX varnish and 1% timol + FMD (CHX 0.2% - 2 days 2x / day) - Probiotic group and Control group | 62 adults with salivary SM count > 6.10 <sup>5</sup> CFU / mL - 19-35 years | Lozenges - 6 weeks (twice a day) | <i>Lactobacillus reuteri</i> DSM 17938 and ATCC PTA 5289 |
|------------------------------------------------|----------------------------------------------------------------------------|----------------------------------------------------------------------------------------------------------------------------------------------------------------------|-----------------------------------------------------------------------------|----------------------------------|----------------------------------------------------------|
