# Supplementary material for: Probiotics in Oral Health and Disease: A Systematic Review
Source: MDPI journal article supplement (doi:10.3390/app11178070), 2021-08-31
Supplement: s1 [file s1]

**Probiotics in oral health and disease: a systematic review**

Perrine Saiz, Nuno Taveira and Ricardo Alves, Centro de Investigação Interdisciplinar Egas Moniz (CiiEM), Instituto Universitário Egas Moniz, 2829-511 Monte de Caparica, Portugal. Corresponding author: Nuno Taveira ([ntaveira@egasmoniz.edu.pt](mailto:ntaveira@egasmoniz.edu.pt))

**Table S4-** Characteristics of clinical trials of probiotics in gingivitis and gingival health

| Reference<br>Oral condition                                             | Parameters evaluated -<br>Evaluation time                                                                                                                     | Study design -<br>Groups of study                                                                                                                            | Sample size<br>(at the end of the study) -<br>Age or age group                                                                                 | Vehicle -<br>Administration time                                                          | Probiotic strain(s) used<br>(Dose)                                                                                                                                                                                                                |
|-------------------------------------------------------------------------|---------------------------------------------------------------------------------------------------------------------------------------------------------------|--------------------------------------------------------------------------------------------------------------------------------------------------------------|------------------------------------------------------------------------------------------------------------------------------------------------|-------------------------------------------------------------------------------------------|---------------------------------------------------------------------------------------------------------------------------------------------------------------------------------------------------------------------------------------------------|
| <b>Alanzi <i>et al.</i>, 2018</b><br>Gingival health                    | Clinical: PI, GI / Microbiological (saliva and plaque samples) -<br>baseline and 4 weeks                                                                      | RCT placebo-controlled, double-blind -<br>Probiotic group and Placebo group                                                                                  | 101 healthy patients -<br>13-15 years                                                                                                          | Lozenges -<br>4 weeks (twice a day)                                                       | <i>Lactobacillus rhamnosus</i> ,<br><i>Bifidobacterium lactis</i><br>(4.8 x 10 <sup>8</sup> CFU each)                                                                                                                                             |
| <b>Deshmukh <i>et al.</i>, 2017</b><br>Gingival health                  | Clinical: OHI-S, PI, GI -<br>baseline, 7, 14 days                                                                                                             | RCT placebo-controlled, triple blind -<br>Group A: HiOra 15mL/Group B: CHX 0.2%/Group C: probiotic (dissolved in 20mL water)                                 | 45 healthy patients -<br>18-21 years                                                                                                           | Mouthwash -<br>14 days (twice a day for 60 seconds)                                       | <i>Lactobacillus rhamnosus</i> , <i>Bifidobacterium longum</i> , <i>Lactobacillus acidophilus</i> , <i>Saccharomyces boulardii</i><br>(1.25 x 10 <sup>9</sup> CFU)                                                                                |
| <b>Kuru <i>et al.</i>, 2017</b><br>Gingival health                      | Clinical: PI, GI, PD, BOP/ Immunological: GCF volume, levels of IL-1 -<br>baseline, 28, 33 days (5 days without brushing)                                     | RCT placebo-controlled, simple blind -<br>Probiotic group: 110g yogurt + probiotic<br>Placebo group: yogurt 110g                                             | 51 healthy patients -<br>16-26 years                                                                                                           | Yogurt 110mg -<br>28 days (once a day)                                                    | <i>Bifidobacterium animalis subsp. lactis</i> DN-173010<br>(>10 <sup>8</sup> CFU)                                                                                                                                                                 |
| <b>Yousuf <i>et al.</i>, 2017</b><br>Gingival health                    | Clinical: GI, PI -<br>baseline, 7, 14, 21 days                                                                                                                | RCT controlled, double-blind -<br>Group A: probiotics/Group B: lyophilized lactic acid bacillus/Group C: placebo of calcium carbonate powder 250 g           | 22 healthy patients -<br>12-15 years                                                                                                           | Lyophilized preparation -<br>3 weeks (once a day)                                         | <i>Bifidobacterium longum</i> , <i>Lactobacillus acidophilus</i> , <i>Bifidobacterium bifidum</i> , <i>Bifidobacterium lactis</i> and lactic acid <i>Bacillus</i>                                                                                 |
| <b>Hallström <i>et al.</i>, 2013</b><br>Experimental gingivitis         | Clinical: GI, PI, BOP/Microbiological/ Immunological: GCF volume, levels of cytokines -<br>baseline, 3 weeks                                                  | RCT, cross-controlled, double-blind<br>Run in 2 weeks / intervention 3 weeks / washout 2 weeks / intervention 3 weeks -<br>Probiotic group and Placebo group | 18 healthy women -<br>mean age 38 years                                                                                                        | Lozenges -<br>3 weeks (twice a day)                                                       | <i>Lactobacillus reuteri</i> DSM17938 and ATCC PTA 5289                                                                                                                                                                                           |
| <b>Keller <i>et al.</i>, 2018</b><br>Gingivitis                         | Clinical: BOP, PI/Immunological: GCF volume, levels of IL-1 $\beta$ , IL-6, IL-8, IL-10, TNF- $\alpha$ in GCF -<br>baseline, 2, 4, 6 weeks                    | RCT placebo-controlled, double-blind -<br>Probiotic group and Placebo group                                                                                  | 47 patients with at least 2 sites with moderate gingival inflammation according to the Löe index, with PD $\leq$ 5 mm -<br>mean age 26,9 years | Tablet -<br>4 weeks (twice a day)                                                         | <i>Lactobacillus rhamnosus</i> PB01, DSM 14869, <i>Lactobacillus curvatus</i> EB10, DSM 32307                                                                                                                                                     |
| <b>Sabatini <i>et al.</i>, 2017</b><br>Gingivitis in diabetics type II  | Clinical: PI, BOP -<br>baseline and 30 days                                                                                                                   | RCT controlled, double-blind -<br>Probiotic group and Control group                                                                                          | 80 patients with diabetes type II controlled and generalized gingivitis -<br>mean age 47 years                                                 | Tablet -<br>30 days (twice a day)                                                         | <i>Lactobacillus reuteri</i> DSM 17938 and ATCC PTA 5289                                                                                                                                                                                          |
| <b>Alkaya <i>et al.</i>, 2017</b><br>Gingivitis                         | Clinical: PI, GI, PD, BOP, coating lingual -<br>3 and 8 weeks                                                                                                 | RCT placebo-controlled, double-blind -<br>Probiotic group and Placebo group                                                                                  | 40 healthy patients, generalized gingivitis -<br>18-31 years                                                                                   | Toothpaste, mouthwash, cleanser brush (3 modes of application) -<br>8 weeks (twice a day) | <i>Bacillus subtilis</i> , <i>Bacillus megaterium</i> , <i>Bacillus pumilus</i><br>(5.9 x 10 <sup>7</sup> spores)                                                                                                                                 |
| <b>Montero <i>et al.</i>, 2017</b><br>Gingivitis                        | Clinical: PI, GI/Microbiological -<br>baseline and 6 weeks                                                                                                    | RCT placebo-controlled, double-blind -<br>Probiotic group and Placebo group                                                                                  | 52 patients with gingivitis -<br>18-55 years                                                                                                   | Tablet -<br>6 weeks (twice a day)                                                         | <i>Lactobacillus plantarum</i> , <i>Lactobacillus brevis</i> , <i>Peiococcus acidilactici</i><br>(1 x 10 <sup>3</sup> CFU each)                                                                                                                   |
| <b>Schlagenhauf <i>et al.</i>, 2016</b><br>Gingivitis in pregnant women | Clinical: GI, PI/Microbiological: <i>P. intermedia</i> /Immunological: levels of TNF- $\alpha$ -<br>baseline and 2 days <i>postpartum</i>                     | RCT placebo-controlled, double-blind -<br>Probiotic group and Placebo group                                                                                  | 45 healthy women with pregnancy gingivitis (3 <sup>rd</sup> trimester of pregnancy) -<br>24-40 years                                           | Tablet -<br>Twice a day until birth (about 7 weeks)                                       | <i>Lactobacillus reuteri</i> DSM17938 and ATCC PTA 5289<br>(> 10 <sup>8</sup> CFU each)                                                                                                                                                           |
| <b>Nadkerny <i>et al.</i>, 2015</b><br>Gingivitis                       | Clinical: PI, GI, IHO-S -<br>baseline, 2 and 4 weeks                                                                                                          | RCT, controlled -<br>Group A: probiotics/Group B: 0.02% CHX (positive control)/Group C: saline solution (negative control)                                   | 45 healthy patients with chronic gingivitis -<br>20-30 years                                                                                   | Mouthwash -<br>15 days (twice a day for 60 seconds)                                       | <i>Lactobacillus rhamnosus</i> , <i>Bifidobacterium longum</i> , <i>Lactobacillus acidophilus</i> , <i>Saccharomyces</i> , <i>Lactobacillus sporogenes</i><br>(1.25 x 10 <sup>9</sup> CFU)                                                        |
| <b>Lee <i>et al.</i>, 2015</b><br>Experimental gingivitis               | Clinical: PI, GI, BOP/ Immunological: levels of MMP-8, PGE2, NO in GCF samples -<br>baseline, 3, 7, 10 and 14 days (PI and GI weren't evaluated on days 3,10) | RCT placebo-controlled, double-blind -<br>Probiotic group and Placebo group                                                                                  | 18 healthy patients -<br>mean age 38 years                                                                                                     | Lozenges-<br>3 weeks (twice a day)                                                        | <i>Lactobacillus brevis</i> CD2                                                                                                                                                                                                                   |
| <b>Dhawan &amp; Dhawan 2013</b><br>Gingivitis                           | Clinical: PI, GI, tarter -<br>baseline, 14, 28 days                                                                                                           | RCT placebo-controlled, double-blind -<br>Group B probiotic and Group A placebo                                                                              | 36 healthy patients with chronic gingivitis -<br>mean age 21 years                                                                             | Tablet -<br>2 weeks (twice a day)                                                         | <i>Lactobacillus sporogenes</i> (100 x 10 <sup>6</sup> CFU), <i>Streptococcus faecalis</i> PC (60 x 10 <sup>6</sup> CFU), <i>Clostridium butircum</i> TO-A (4 x 10 <sup>6</sup> CFU), <i>Bacillus mesentericus</i> TO-A (2 x 10 <sup>6</sup> CFU) |

|                                                  |                                                                                                                                                   |                                                                                                                                                                    |                                                      |                                  |                                                                                    |
|--------------------------------------------------|---------------------------------------------------------------------------------------------------------------------------------------------------|--------------------------------------------------------------------------------------------------------------------------------------------------------------------|------------------------------------------------------|----------------------------------|------------------------------------------------------------------------------------|
| <b>Iniesta <i>et al.</i>, 2012</b><br>Gingivitis | Clinical: PI, GI/ Microbiological (saliva and subgingival samples) - baseline, 4 and 8 weeks (weeks 2, 4, 6, 8 monitoring probiotic colonization) | RCT prospective cross-over, placebo-controlled, double-blind<br>Intervention 4 weeks/ washout 4 weeks/ intervention 4 weeks -<br>Probiotic group and Placebo group | 40 healthy patients with gingivitis -<br>20-24 years | Tablet -<br>4 weeks (once a day) | <i>Lactobacillus reuteri</i> DSM17938 and ATCC PTA5289 (2.9 x 10 <sup>8</sup> CFU) |
|--------------------------------------------------|---------------------------------------------------------------------------------------------------------------------------------------------------|--------------------------------------------------------------------------------------------------------------------------------------------------------------------|------------------------------------------------------|----------------------------------|------------------------------------------------------------------------------------|
