# Supplementary material for: Probiotics in Oral Health and Disease: A Systematic Review
Source: MDPI journal article supplement (doi:10.3390/app11178070), 2021-08-31
Supplement: s1 [file s1]

# Probiotics in oral health and disease: a systematic review

Perrine Saiz, Nuno Taveira and Ricardo Alves, Centro de Investigação Interdisciplinar Egas Moniz (CiEM), Instituto Universitário Egas Moniz, 2829-511 Monte de Caparica, Portugal. Corresponding author: Nuno Taveira ([ntaveira@egasmoniz.edu.pt](mailto:ntaveira@egasmoniz.edu.pt))

**Table S8-** Characteristics of clinical trials of probiotics in orthodontics

| Reference<br>Oral condition                                                   | Parameters evaluated -<br>Evaluation time                                                                                                       | Study design -<br>Groups of study                                                                                                                                                                            | Sample size<br>(at the end of the study)-<br>Age or age group                                            | Vehicle -<br>Administration time                                                                                | Probiotic strain(s) used<br>(Dose)                                                                                                                                                                                                                                                           |
|-------------------------------------------------------------------------------|-------------------------------------------------------------------------------------------------------------------------------------------------|--------------------------------------------------------------------------------------------------------------------------------------------------------------------------------------------------------------|----------------------------------------------------------------------------------------------------------|-----------------------------------------------------------------------------------------------------------------|----------------------------------------------------------------------------------------------------------------------------------------------------------------------------------------------------------------------------------------------------------------------------------------------|
| <b>Alp &amp; Baka 2018</b><br>Orthodontics                                    | Salivary flux, buffer capacity, SM and LB<br>salivary counts -<br>baseline, 3, 6 weeks                                                          | RCT, no-blind -<br>Group 1: control /Group 2: systemic probiotic/Group 3:<br>local probiotic                                                                                                                 | 45 patients with orthodontic<br>treatment at least 3 months -<br>12-17 years                             | Systemic probiotic: 100mL of kefir<br>(twice a day) / Local probiotic:<br>toothpaste (twice a day) -<br>6 weeks | Systemic probiotic: mix lactic acid<br>bacteria ( <i>Lactococcus lactis subsp.</i> ,<br><i>Leuconostoc spp.</i> , <i>Lactobacillus spp</i><br>and <i>S. thermophilus</i> ) and yeasts<br>isolated from cereal grains)<br>Local probiotic: bacteriocin extracted<br>from lactic acid bacteria |
| <b>Gizani et al., 2016</b><br>Orthodontics and<br>white spot                  | Clinical: WSL, PI / Microbiological: SM,<br>LB (saliva samples) -<br>baseline, after orthodontic appliance removal                              | RCT prospective, placebo-controlled, double-blind -<br>Probiotic group and Placebo group                                                                                                                     | 85 patients with maxillary at<br>least 8 anterior teeth -<br>mean age 15,9 years                         | Lozenges -<br>17 months (once a day)                                                                            | <i>Lactobacillus reuteri</i> DSM 17938 and<br>ATCC PTA 5289<br>(10 <sup>8</sup> CFU each)                                                                                                                                                                                                    |
| <b>Kohar et al., 2015</b><br>Orthodontics and<br>periodontal<br>condition     | Clinical: PI, GI, hygiene oral, papillary<br>bleeding -<br>baseline, 14 days                                                                    | RCT: 1 <sup>st</sup> step periodontal treatment and 2 <sup>nd</sup> step<br>probiotic intervention -<br>Group 1: controlled group/Group 2: probiotic group<br>(lozenges)/Group 3: probiotic group (milk)     | 30 patients with orthodontic<br>treatment -<br>18-25 years                                               | Lozenges ( <i>L.reuteri</i> ) or milk 65mL<br>( <i>L. casei</i> ) –<br>14 days (once a day)                     | <i>Lactobacillus reuteri</i> (200 x 10 <sup>6</sup> CFU)<br>or<br><i>Lactobacillus casei</i> (6.5 x 10 <sup>6</sup> CFU)                                                                                                                                                                     |
| <b>Pinto et al., 2014</b><br>Orthodontics                                     | Microbiological (saliva and plaque samples)<br>total SM, LB counts -<br>baseline, 14 days                                                       | RCT cross-over, placebo-controlled, double-blind<br>4 periods: run-in (1week) / intervention (2weeks) /<br>washout (4weeks) /intervention (2weeks) -<br>Test group: probiotic yogurt / Control group: yogurt | 26 patients with fixed bi-<br>maxillary<br>orthodontic treatment -<br>10-30 years                        | Yogurt 200g -<br>2 weeks (once a day)                                                                           | <i>Bifidobacterium animalis subsp.lactis</i><br>DN-173010                                                                                                                                                                                                                                    |
| <b>Ritthagol et al.,<br/>2014</b><br>Cleft lip and palate<br>and orthodontics | Clinical: caries/Biochemical (salivary pH)/<br>Microbiological: SM, LB and probiotic<br>colonization -<br>baseline, 1, 2, 3, 4 weeks            | RCT placebo-controlled, double-blind -<br>Group A: probiotic 10g milk powder with probiotic in<br>50mL of water/Group B: control                                                                             | 30 patients with non-syndromic<br>cleft lip and palate treated<br>orthodontically -<br>mean age 19 years | Milk -<br>4 weeks (once a day)                                                                                  | <i>Lactobacillus paracasei SD1</i>                                                                                                                                                                                                                                                           |
| <b>Jose et al., 2013</b><br>Orthodontics                                      | Microbiological: (plaque samples on<br>vestibular surfaces around brackets of upper<br>lateral incisors) SM counts (PCR) -<br>baseline, 30 days | RCT double-blind -<br>Group 1: control/Group 2: systemic probiotic (200 mg<br>active plus Nestle 1x / day) + toothpaste with<br>fluoride/Group 3: probiotic toothpaste (2x / day)                            | 60 patients with orthodontic<br>straight-line appliance (MBT,<br>slot 0.022) -<br>14-29 years            | Toothpaste (2x/day) or curd 200mg<br>(1x/day) for 30 days                                                       | N/A                                                                                                                                                                                                                                                                                          |
