# Supplementary material for: Probiotics in Oral Health and Disease: A Systematic Review
Source: MDPI journal article supplement (doi:10.3390/app11178070), 2021-08-31
Supplement: s1 [file s1]

# Probiotics in oral health and disease: a systematic review

Perrine Saiz, Nuno Taveira and Ricardo Alves, Centro de Investigação Interdisciplinar Egas Moniz (CiEM), Instituto Universitário Egas Moniz, 2829-511 Monte de Caparica, Portugal. Corresponding author: Nuno Taveira ([ntaveira@egasmoniz.edu.pt](mailto:ntaveira@egasmoniz.edu.pt))

**Table S6-** Characteristics of clinical trials of probiotics in peri-implantitis

| Reference<br>Oral condition                                                   | Parameters evaluated -<br>Evaluation time                                                                                                                                                                 | Study design -<br>Groups of study                                                                                                                                                                                                                                                                                                                                                                                           | Sample size<br>(at the end of the study)-<br>Age or age group                                                                                                                                   | Vehicle -<br>Administration time                                          | Probiotic strain(s) used<br>(Dose)                                                                                                                        |
|-------------------------------------------------------------------------------|-----------------------------------------------------------------------------------------------------------------------------------------------------------------------------------------------------------|-----------------------------------------------------------------------------------------------------------------------------------------------------------------------------------------------------------------------------------------------------------------------------------------------------------------------------------------------------------------------------------------------------------------------------|-------------------------------------------------------------------------------------------------------------------------------------------------------------------------------------------------|---------------------------------------------------------------------------|-----------------------------------------------------------------------------------------------------------------------------------------------------------|
| <b>Laleman et al., 2020</b><br>Peri-implantitis                               | Clinical: PI, GI, BOP, PD/<br>Microbiological (tongue, salivary,<br>subgingival samples) -<br>baseline, 6, 12, 24 weeks                                                                                   | RCT, double-blind, pilot study / 1 <sup>st</sup> step: SRP, 5<br>topical drop -<br>Probiotic group and Placebo group                                                                                                                                                                                                                                                                                                        | 19 patients with initial peri-<br>implantitis (pocket >6mm, bone<br>loss 3mm) –                                                                                                                 | Drop (5) and lozenges –<br>12 weeks (twice a day)                         | <i>Lactobacillus reuteri</i> ATCC PTA 5289 and<br>DSM 17938<br>(10 <sup>8</sup> CFU)                                                                      |
| <b>Lauritano et al., 2019</b><br>Peri-implant mucositis                       | Clinical: GI, PD/Microbiological:<br><i>P.gingivalis</i> , <i>T.forsythia</i> , <i>T.denticola</i> -<br>baseline, 28 days                                                                                 | RCT controlled placebo, pilot study -<br>Probiotic group and Placebo group                                                                                                                                                                                                                                                                                                                                                  | 10 healthy patients -                                                                                                                                                                           | Lozenges –<br>28 days (once a day)                                        | <i>Lactobacillus reuteri</i>                                                                                                                              |
| <b>Ahmedbeyli et al., 2019</b><br>Peri-implant mucositis                      | Clinical: PI, GI, BOP, PD/<br>Microbiological/ Immunological: levels of<br>IL-1 $\beta$ , IL-4, TNF- $\alpha$ (pg/mL)) -<br>baseline, 1, 6 months                                                         | RCT controlled / 1 <sup>st</sup> step: periodontal treatment -<br>Probiotic group and Placebo group                                                                                                                                                                                                                                                                                                                         | 42 patients -                                                                                                                                                                                   | Sachet 4g -<br>30 days (once a day)                                       | <i>L. reuteri</i> DSM 26866, <i>L. rhamnosus</i> DSM<br>21690, <i>L. bulgaricus</i> DSM21690,<br><i>Bifidobacterium animalis ssp. Lactis</i> DSM<br>17741 |
| <b>Peña et al., 2018</b><br>Peri-implant mucositis                            | Clinical: PI, BOP, PD, BOP)/Radiological<br>(marginal bone loss) /Microbiological<br>(subgingival plaque in peri-implant pocket<br>samples) -<br>baseline, 15, 45, 135 days                               | RCT parallel, triple-blind<br>Screening (day 0) -> 0.12% CHX for 15 days -><br>day 45: intervention beginning (30 days) -<br>Probiotic group (mechanical therapy + CHX<br>0.12% + probiotic)/Control group (mechanical<br>therapy + CHX 0.12%)                                                                                                                                                                              | 50 healthy patients with implant<br>with peri-implant mucositis -<br>> 18 years                                                                                                                 | Tablet -<br>1 month (once a day)                                          | <i>Lactobacillus reuteri</i> DSM 17938 and<br>ATCC PTA 5289                                                                                               |
| <b>Galofré et al., 2018</b><br>Peri-implant mucositis<br>and peri-implantitis | Clinical: PI, BOP, PD/Microbiological<br>(peri-implantar subgingival microbiota<br>samples) -<br>baseline, 30, 90 days                                                                                    | RCT prospective, controlled, triple-blind -<br>Probiotic group (mechanical therapy +<br>probiotic)/Control group (mechanical therapy)                                                                                                                                                                                                                                                                                       | 44 adults partially edentulous<br>patients and implants with<br>mucositis or peri-implantitis -                                                                                                 | Lozenge -<br>30 days (once a day)                                         | <i>Lactobacillus reuteri</i> DSM 17938 and<br>ATCC PTA 5289<br>(1 x 10 <sup>8</sup> CFU each)                                                             |
| <b>Mongardini et al., 2017</b><br>Experimental peri-<br>implant mucositis     | Clinical: PI, BOP -<br>baseline, 2, 6 weeks                                                                                                                                                               | RCT cross-over controlled, double-blind<br>Screening ->1 <sup>st</sup> induction disease phase (2weeks<br>with acrylic stent to use during brushing) -> 1 <sup>st</sup><br>intervention phase (14 days)-> washout (28 days)<br>-> 2 <sup>nd</sup> induction disease phase (14 days) -> 2 <sup>nd</sup><br>intervention phase (14 days) -<br>Probiotic group and Placebo group                                               | 19 healthy patients with dental<br>implant (1-13 years<br>in function) -<br>39-78 years                                                                                                         | Tablet -<br>14 days (once a day)                                          | <i>Lactobacillus plantarum</i> , <i>Lactobacillus</i><br><i>brevis</i>                                                                                    |
| <b>Hallström et al., 2016</b><br>Peri-implant mucositis                       | Clinical: PD, BOP/Microbiological/<br>Immunological: levels of IL-1 $\beta$ , IL-1RA,<br>IL-4, IL-6, IL-8, IL-17A, CCL5, TNF- $\alpha$ ,<br>IFN- $\gamma$ and GM-CSF -<br>baseline, 1, 2, 4, 12, 26 weeks | RCT controlled, double-blind -<br>Probiotic group and Placebo group                                                                                                                                                                                                                                                                                                                                                         | 49 patients with peri-implant<br>mucositis with one or more peri-<br>implant sites with PD = 4 mm<br>with bleeding and / or pus<br>probing -<br>24-85 years                                     | Oil topical application 1 time and<br>lozenge -<br>3 months (twice a day) | <i>Lactobacillus reuteri</i> DSM 17938 and<br>ATCC PTA 5289<br>(2 x 10 <sup>7</sup> CFU)                                                                  |
| <b>Flichy-Fernández et al., 2015</b><br>Peri-implant mucositis                | Clinical: PI, PD, GI, PICF/Immunological:<br>levels of IL-6, IL-8, IL-1 $\beta$ -<br>baseline, 1, 2, 8, 9, 10, 16, 17, 18 months                                                                          | RCT cross-over prospective placebo-controlled,<br>double-blind<br>Prophylaxis (wait 1 month)-> intervention (1<br>month)-> prophylaxis (wait 6 months), new<br>prophylaxis (wait 1 month)-> placebo -><br>prophylaxis (wait 6 months), new prophylaxis<br>(2months), new prophylaxis -<br>Group A: no peri-implant disease (22 patients, 54<br>implants)/Group B: with peri-implant mucositis<br>(12 patients, 23 implants) | 34 healthy non-smoking patients<br>with at least one fully edentulous<br>dental arch with rehabilitation on<br>implant, prosthesis in function for<br>at least 24 months -<br>mean age 60 years | Tablet -<br>30 days (once a day)                                          | <i>Lactobacillus reuteri</i> DSM 17938 (100 x<br>10 <sup>6</sup> active units) and ATCC PTA 5289<br>(200 x 10 <sup>6</sup> active units)                  |
