# Supplementary material for: Probiotics in Oral Health and Disease: A Systematic Review
Source: MDPI journal article supplement (doi:10.3390/app11178070), 2021-08-31
Supplement: s1 [file s1]

# Probiotics in oral health and disease: a systematic review

Perrine Saiz<sup>1</sup>, Nuno Taveira<sup>1</sup> and Ricardo Alves<sup>1</sup>

<sup>1</sup>Centro de Investigação Interdisciplinar Egas Moniz (CiEM), Instituto Universitário Egas Moniz, 2829-511 Monte de Caparica, Portugal, Corresponding author: Nuno Taveira ([ntaveira@egasmoniz.edu.pt](mailto:ntaveira@egasmoniz.edu.pt))

**Table S2** - PICOS criteria

|          |                          |                                                                                                                                                                         |
|----------|--------------------------|-------------------------------------------------------------------------------------------------------------------------------------------------------------------------|
| <b>P</b> | Population or Problem    | Any age (adults, children, the elderly), without gender restriction, healthy or not                                                                                     |
| <b>I</b> | Intervention or Exposure | Use of any probiotic (alone or in combination), considering any dosage regimen, vehicle of delivery or frequency of intervention                                        |
| <b>C</b> | Comparison               | Placebo controlled or non-placebo controlled (compared to another active intervention)                                                                                  |
| <b>O</b> | Outcomes                 | Primary: oral health benefits in clinical, microbiological, immunological, biochemical parameters<br>Secondary: any adverse effects, rate of adherence, quality of life |
| <b>S</b> | Study design             | Randomized clinical trials without any information of blinding, blind (single, double or triple)                                                                        |
