# Supplementary material for: Probiotics in Oral Health and Disease: A Systematic Review
Source: MDPI journal article supplement (doi:10.3390/app11178070), 2021-08-31
Supplement: s1 [file s1]

# Probiotics in oral health and disease: a systematic review

Perrine Saiz, Nuno Taveira and Ricardo Alves, Centro de Investigação Interdisciplinar Egas Moniz (CiiEM), Instituto Universitário Egas Moniz, 2829-511 Monte de Caparica, Portugal. Corresponding author: Nuno Taveira ([ntaveira@egasmoniz.edu.pt](mailto:ntaveira@egasmoniz.edu.pt))

**Table S9-** Characteristics of clinical trials of probiotics in halitosis

| Reference<br>Oral condition                                    | Parameters evaluated -<br>Evaluation time                                                                                                                          | Study design -<br>Groups of study                                                                                                                                                                                                                                      | Sample size<br>(at the end of the study)-<br>Age or age group | Vehicle -<br>Administration time     | Probiotic strain(s) used<br>(Dose)                                                                                      |
|----------------------------------------------------------------|--------------------------------------------------------------------------------------------------------------------------------------------------------------------|------------------------------------------------------------------------------------------------------------------------------------------------------------------------------------------------------------------------------------------------------------------------|---------------------------------------------------------------|--------------------------------------|-------------------------------------------------------------------------------------------------------------------------|
| <b>Lee et al., 2020</b><br>Halitosis                           | Organoleptic test, VSC, bad breath improvement score, oral colonization of <i>W.cibaria</i> , vital signs, hematology and blood chemistry - baseline, 4,8 weeks    | RCT double-blind, placebo controlled /1 <sup>st</sup> step: SRP - Probiotic group and Placebo group                                                                                                                                                                    | 68 healthy adults with halitosis- 20-39 years                 | Tablet (800g)– 8 weeks (once a day)  | <i>Weissella cibaria</i> (10 <sup>8</sup> CFU/g + isomalt, sucralose, mint flavor, maltodextrin and magnesium stearate) |
| <b>Benic et al., 2019</b><br>Halitosis in ortodontics patients | Clinical: PI, GI, VSC/ Microbiological: <i>Streptococcus</i> , <i>Rothia</i> , <i>Selenomonas</i> , <i>Actinomyces</i> and <i>Lautropia</i> - baseline,1, 3 months | RCT placebo controlled, triple-blind, prospective - Probiotic group and Placebo group (+ 20 mg isomalt)                                                                                                                                                                | 64 orthodontic patients - 10-30 years                         | Lozenges- 1 month (twice a day)      | <i>Streptococcus salivarius M18</i> (3.6 x 10 <sup>9</sup> CFU)                                                         |
| <b>Suzuki et al., 2014</b><br>Halitosis and oral health        | Clinical: organoleptic scores OLT, VCS, PD, PI, coating lingual, salivary flow/ Microbiological - baseline, 14 days                                                | RCT cross-over, placebo-controlled, double-blind Intervention 14 days/washout 2 weeks/intervention 14 days- Probiotic group (with 280 mg xylitol/tablet) / Placebo group (xylitol 280 mg/tablet)                                                                       | 23 adults with halitosis - 22-67 years                        | Tablet - 14 days (three times a day) | <i>Lactobacillus salivarius</i> WB21 (6.7 x 10 <sup>8</sup> colonies)                                                   |
| <b>Keller et al., 2012</b><br>Halitosis                        | Clinical: organoleptic scores, VCS (Halimeter) - baseline, 14 days                                                                                                 | RCT cross-over, placebo-controlled, double-blind Intervention 2 weeks/ washout 3 weeks/ intervention 2 weeks - Probiotic group / Placebo group (lozenge containing, isomalt, hydrogenated palm oil, sucrose esters of fatty acids, mint oil, menthol flavor sucralose) | 25 adults with subjective feeling of bad breath - 19-25 years | Lozenge - 2 weeks (twice a day)      | <i>Lactobacillus reuteri</i> DSM 17938 and ATCC PTA 5289 (10 <sup>8</sup> CFU)                                          |
